# Supplementary material for: The effects of arginine glutamate, a promising excipient for protein formulation, on cell viability: Comparisons with NaCl
Source: PubMed Central journal article supplement (PMC4837223; doi:10.1016/j.tiv.2016.02.002), 2016-06
Supplement: mmc1.pdf [file mmc1.pdf]

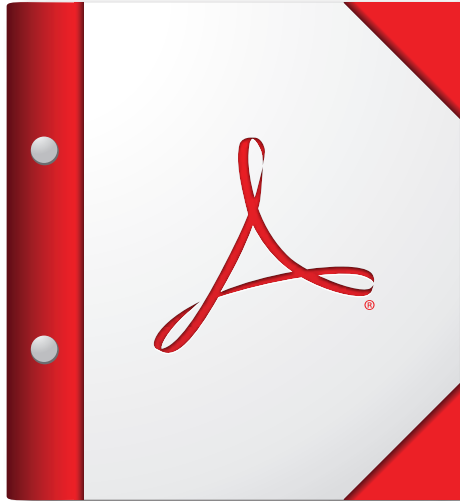

**For the best experience, open this PDF portfolio in  
Acrobat 9 or Adobe Reader 9, or later.**

[Get Adobe Reader Now!](#)
